# Supplementary material for: A high throughput screen for active human transposable elements
Source: PubMed Central journal article supplement (PMC5796560; doi:10.1186/s12864-018-4485-4), 2018-02-01
Supplement: 12864_2018_4485_MOESM1_ESM.pdf [file 12864_2018_4485_MOESM1_ESM.pdf]

# Supplemental Material: A high throughput screen for active human transposable elements

---

Erika M. Kvikstad<sup>1,2</sup>, Paolo Piazza<sup>1,3</sup>, Jenny C. Taylor<sup>1,2</sup>, Gerton Lunter<sup>1</sup>

<sup>1</sup>Wellcome Trust Centre for Human Genetics, Oxford, UK

<sup>2</sup>National Institute for Health Research Comprehensive Biomedical Research Centre, Oxford, UK

<sup>3</sup>Department of Medicine, Imperial College London, London, UK

## DETAILED PROCEDURES

### Materials

#### *DNA quantity and quality*

Genomic DNA libraries can be prepared from as little as ~100ng of genomic DNA. Quantify the samples using a fluorescence-incorporation approach to ensure accuracy (eg, using Nanodrop, Qubit spectrophotometer or, for larger batches, picogreen is preferable). DNA sample integrity and median library size can be determined using Agilent 2200 TapeStation and Genomic screen tape.

#### *Reagents*

Ensure that sufficient volumes of the following reagents are available:

- NEBNext Ultra DNA Library Kit for Illumina (New England Biolabs, cat. no.E7370)
- RecJf (New England Biolabs, cat. no.M0264L)
- NEBNext Q5 High-fidelity 2x PCR master mix (New England Biolabs, cat. no.M0541L)
- Magnesium chloride Mg<sup>2+</sup> (25mM; VWR, cat.no.PAA3513)
- DNase/RNase-free H<sub>2</sub>O ultraPure (Life Technologies Ltd, cat. no. 10977-015)
- Dual index primers 25 μM (Table S2)
- TE protocol primers 25 μM (Table S2)
- 80% (v/v) ethanol
- Agencourt AMPure XP magnetic beads (Beckman Coulter, cat. no.A63882)
- EB elution buffer (Quiagen Ltd, cat. no. 19086)
- Qubit Molecular probes dsDNA HS assay kit (Life Technologies Ltd, cat. no. Q32854)
- Agilent TapeStation D1000 reagents (Agilent Technologies, cat. no. 5067-5583)
- Agilent TapeStation D1000 Screen Tape (Agilent Technologies, cat. no. 5067-5582)
- Agilent TapeStation High sensitivity D1000 reagents (Agilent Technologies, cat. no. 5067-5585)
- Agilent TapeStation High Sensivity D1000 Screen Tape (Agilent Technologies, cat. no. 5067-5584)
- Agilent TapeStation Genomic DNA Reagents (Agilent Technologies, cat. no. 5067-5366)
- Agilent TapeStation Genomic DNA Screen Tape (Agilent Technologies, cat. no. 5067-5365)

#### *Equipment*

- Thermal cycler, e.g. DNA Engine tetrad PTC-225 (MJ Research, Bio-Rad), or equivalent
- Microcentrifuge
- Qubit 2.0 fluorometer (Life Technologies Ltd, cat. no. Q32866)
- Qubit assay tubes (Life Technologies Ltd, cat. no. Q32856)

- Agilent 2200 TapeStation (Agilent Technologies)
- Benchtop vortex, e.g. (VWR, cat. no. 82019-170), or equivalent
- Centrifuge with 96-well SBS plate carrier (e.g. Beckman), or equivalent
- DynaMag-96 side skirted magnet (Life Technologies Ltd, cat.no.12027)
- Filtered pipette tips, e.g. Rainin P20, P200 (Anachem Ltd, cat. no.s RTL10FLR, RLT200F), or equivalent
- Agilent TapeStation loading tips (Agilent Technologies, cat. no. 5064-5153)
- Optical Tube strips (Agilent Technologies, cat. no. 401428)
- Optical Strip caps (Agilent Technologies, cat. no. 401425)
- 96-well SBS plate, skirted, 0.2 mL capacity, e.g. Eppendorf twin.tec 96-well PCR plates, fully-skirted (VWR, cat. no. 47744-116), or equivalent
- Test tube 1.5mL LoBind PCR (Eppendorf, cat. no. 80077-230), or equivalent

## Procedures

### *Preparation of genomic libraries*

Prepare genomic libraries for next generation whole genome sequencing according to NEBNext Ultra DNA Library Kit (New England Biolabs, Ipswich, Massachusetts) for Illumina which performs well with low input genomic DNA (~100 ng) used here.

NB: if starting with existing whole genome libraries, proceed to step 4.

1. Fragment genomic DNA to desired size range (median 500 bp) using sonication (e.g., Covaris, Woburn, Massachusetts), or enzymatic digestion (e.g., NEBNext dsDNA Fragmentase, cat. no. M0348) according to manufacturer's specifications.
2. Proceed with end repair and adaptor ligation as per manufacturers specifications.
3. Generate library fragments with full length adapters by PCR extension using index primers (Table S2) and following manufacturer's specifications.

### *Initial DNA purification and size selection of library*

Perform a solid phase reversible immobilization (SPRI) size selection and DNA purification to retain DNA fragments larger than ~ 200 bp, using Agencourt AMPure XP magnetic beads (Beckman Coulter, Brea, California) and a ratio **0.85x** DNA library volume.

NB: If generating library in steps 1-3 above, proceed to step 15.

4. Increase volume of DNA library to 50  $\mu$ L using EB buffer
5. Allow AMPure Xp beads to equilibrate at room temperature. Gently shake the AMPure XP bottle to resuspend the magnetic beads.
6. Add **0.85x** ratio beads to DNA library volume: 42.5  $\mu$ L beads per 50  $\mu$ L DNA library. Mix thoroughly by pipetting up and down 15-20 times until the solution appears homogenous. (NB: do not increase the volume to 1:1 ratio; a less-than-standard ratio ensures that adapter dimer carryover is minimized.)
7. Incubate at room temperature for ~5 minutes. This step allows binding of PCR products approximately 150 bp and larger to bind the magnetic beads, and ensures maximum recovery.

8. Transfer the plate to an Agencourt DynaMag-96 side skirted magnet bar plate, and allow to sit for 5-10 minutes or until the solution is clear and beads formed in a pellet.
9. Slowly aspirate the cleared solution from the reaction plate, while avoid perturbing the bead pellet. Retain the supernatant until confirmation of maximum recovery by quantification/sizing.
10. Dispense 150  $\mu\text{L}$  of 80% ethanol solution to each well and incubate for 30 seconds at room temperature. Aspirate and discard. Repeat for a total of 2 ethanol washes.
11. Place the reaction plate on bench top to dry for  $\sim$ 5 minutes.

NB: Be sure to remove all ethanol from the bottom of the well, as this may contain residual contaminants. Allow ethanol to evaporate completely (bead pellet will appear opaque, no longer reflective), but avoiding over-drying of pellet (cracking) as this increases the difficulty of fluid resuspension.

12. Elute DNA from SPRI beads in 20  $\mu\text{L}$  of EB elution buffer (dih20, TRIS-Acetate, or TE), seal to vortex for 30 seconds or pipette mix 10 times.
13. Incubate at room temperature for 2 minutes for efficient elution.
14. Place on magnet for  $\sim$ 1-2 minutes to allow beads to separate from eluted DNA, and transfer the eluate to a clean PCR reaction tube/plate.

#### ***Post library prep quality control***

15. Quantify the library concentration using Qubit (Life Technologies, Carlsbad, California) according to the manufacturer's instructions. A minimum of 10 ng is desired for further processing.
16. Determine size distribution of library fragments using Agilent Tapestation, and High-Sensitivity screen tape (Agilent Technologies, Santa Clara, California). An expected library profile should be free of short ( $<100$  bp) fragments and display a peak at  $\sim$ 500 bp -1 kb (Fig. S1).

#### ***Normalization***

17. To achieve approximately uniform 10ng of post-PCR library for each input sample, manually add appropriate volume of DNA determined by quantification in step 15 to equal  $\sim$ 10 ng of sample for subsequent PCR reactions.

#### ***Target amplification***

To exponentially amplify in multiplex fragments containing 3' sequence and flanking sequence of L1 and Alu insertions.

18. Assemble the following PCR reaction per sample on ice as follows, then vortex gently and centrifuge the solution:

| <b>Component</b>                                  | <b>Volume (<math>\mu\text{L}</math>)</b> | <b>Final Concentration</b> |
|---------------------------------------------------|------------------------------------------|----------------------------|
| DNA library (10ng)                                | varies                                   | -                          |
| dH <sub>2</sub> O                                 | to 17 $\mu\text{L}$                      | -                          |
| NEB Q5 High fidelity 2x PCR mastermix             | 25                                       | 1x                         |
| Mg <sup>2+</sup> (25 mM)                          | 4                                        | 2 mM                       |
| Alu-target primer (25 $\mu\text{M}$ )             | 1                                        | 0.5 $\mu\text{M}$          |
| L1HS-target primer (25 $\mu\text{M}$ )            | 1                                        | 0.5 $\mu\text{M}$          |
| Illumina Universal PCR primer (25 $\mu\text{M}$ ) | 2                                        | 1 $\mu\text{M}$            |
| total                                             | 50                                       | -                          |

19. Carry out the PCR reaction using the following thermal cycling parameters:

| <b>Cycles</b> | <b>Temperature (C)</b> | <b>Time</b> | <b>Step</b>     |
|---------------|------------------------|-------------|-----------------|
| 1             | 98                     | 2 min       | Denaturation    |
|               | 98                     | 10 sec      | Denaturation    |
| 10            | 67                     | 30 sec      | Annealing       |
|               | 72                     | 30 sec      | Extension       |
| 1             | 72                     | 5 min       | Final extension |
| 1             | 10                     | forever     | Hold            |

### ***Post-PCR Purification***

20. Repeat steps in 4-14, using 90  $\mu\text{L}$  of AMPure XP beads per 50  $\mu\text{L}$  of PCR reaction volume in a **1.8 x** ratio. Elute in 20  $\mu\text{L}$  EB elution buffer. This will minimize the carryover of of Illumina Universal PCR primer primer, and selectively retain fragments approximately >100 bp.

### ***P1 asymmetric amplification***

To asymmetrically (linearly) amplify fragments containing sequence complimentary to TE-targeting primers. Double-stranded DNA (dsDNA) products include linear amplification from TE targets, and exponential amplification of TE targets oriented in head-to-head fashion. Background genomic DNA molecules lacking TE priming sites remain largely denatured (due to high complexity), in single- stranded DNA (ssDNA) form.

21. Assemble the following PCR reaction mix on ice, followed by gentle vortex mixing and centrifugation:

| <b>Component</b>                       | <b>Volume (<math>\mu\text{L}</math>)</b> | <b>Final Concentration</b> |
|----------------------------------------|------------------------------------------|----------------------------|
| Clean PCR step 20                      | 19                                       | -                          |
| dH <sub>2</sub> O                      | NA                                       | -                          |
| NEB Q5 High fidelity 2x PCR mastermix  | 25                                       | 1x                         |
| Mg <sup>2+</sup> (25 mM)               | 4                                        | 2 mM                       |
| Alu-target primer (25 $\mu\text{M}$ )  | 1                                        | 0.5 $\mu\text{M}$          |
| L1HS-target primer (25 $\mu\text{M}$ ) | 1                                        | 0.5 $\mu\text{M}$          |
| total                                  | 50                                       | -                          |

22. Carry out the PCR using the following parameters:

| <b>Cycles</b> | <b>Temperature (C)</b> | <b>Time</b> | <b>Step</b>  |
|---------------|------------------------|-------------|--------------|
| 1             | 98                     | 2 min       | Denaturation |
|               | 98                     | 10 sec      | Denaturation |
| 2             | 67                     | 30 sec      | Annealing    |
|               | 72                     | 30 sec      | Extension    |
| 1             | 10                     | forever     | Hold         |

### ***Digestion of background ssDNA fragments***

Perform ssDNA exonuclease digestion to remove unwanted ssDNA fragments from the library.

23. Assemble the RecJf exonuclease reaction (total volume 60  $\mu\text{L}$ ) reaction per sample on ice as follows, then vortex gently and centrifuge the solution:

| <b>Component</b>  | <b>Volume (<math>\mu\text{L}</math>)</b> |
|-------------------|------------------------------------------|
| PCR reaction      | 50                                       |
| dH <sub>2</sub> O | 3                                        |
| NEBuffer 2 (10x)  | 6                                        |
| RecJf             | 1                                        |
| total             | 60                                       |

24. Incubate the reaction according to the following parameters:

| Step         | Cycles | Temperature (C) | Time    |
|--------------|--------|-----------------|---------|
| Digestion    | 1      | 37              | 30 min  |
| Inactivation | 1      | 65              | 20 min  |
| Hold         | 1      | 10              | forever |

### ***Post-digest DNA Purification***

25. Repeat steps 4-14 to remove salts, buffer, enzyme, and primer 1 from solution, and perform size selection to retain fragments > approx. 100 bp. Adding **1.8 x** ratio beads to reaction volume: 108  $\mu$ L beads per 60  $\mu$ L RecJf reaction volume. Elute in 20  $\mu$ L EB elution buffer.

### ***P2 asymmetric amplification***

To asymmetrically amplify fragments containing sequence complimentary to the Illumina universal adaptor sequence. dsDNA products at this stage include linear amplification from TE targets, and remaining background genomic fragments undigested in steps 23-24. Molecules containing TEs in head-to-head orientation lacking Illumina Universal (P5) PCR primer priming sites remain largely denatured (due to high complexity), in ssDNA form, for subsequent removal by exonuclease digestion.

26. Assemble the following PCR reaction mix on ice, followed by gentle vortex mixing and centrifugation:

| Component                                  | Volume ( $\mu$ L) | Final Concentration |
|--------------------------------------------|-------------------|---------------------|
| Clean PCR                                  | 20                | -                   |
| dH2O                                       | 4                 | -                   |
| PCR mastermix (2x)                         | 25                | 1x                  |
| Illumina Universal PCR primer (25 $\mu$ M) | 1                 | 0.5 $\mu$ M         |
| total                                      | 50                | -                   |

27. Carry out the PCR using the following thermal cycling conditions:

| Cycles | Temperature (C) | Time    | Step         |
|--------|-----------------|---------|--------------|
| 1      | 98              | 2 min   | Denaturation |
| 2      | 98              | 10 sec  | Denaturation |
|        | 63              | 30 sec  | Annealing    |
|        | 72              | 30 sec  | Extension    |
| 1      | 10              | forever | Hold         |

### **Digestion off-target ssDNA fragments**

28. Repeat steps 23-24 to perform ssDNA exonuclease digestion to remove unwanted ssDNA fragments from the library.

### **Nested amplification**

Perform nested amplification with a primer designed for further TE specificity, and containing nucleotides to partially reintroduce the Illumina index adaptor. One primer is designed per element (L1HS, AluYa5/8, and AluYb8/9, respectively). Use a dilution of library digested in step 28 as template DNA.

29. Assemble 3 PCR reaction mixes on ice, one per nested primer, followed by vortex mixing and centrifugation:

| <b>Component</b>                              | <b>Volume (<math>\mu</math>L)</b> |
|-----------------------------------------------|-----------------------------------|
| Digested library step 28                      | 4                                 |
| dH <sub>2</sub> O                             | 19                                |
| Q5 High Fidelity 2x PCR mastermix             | 25                                |
| Nested primer (25 $\mu$ M)                    | 1                                 |
| Illumina Universal P5 PCR primer (25 $\mu$ M) | 1                                 |
| total                                         | 50                                |

30. Carry out each PCR amplification according to the following thermal cycling parameters, using the optimal  $T_a$  per nested primer (below):

| <b>Cycles</b> | <b>Temperature (C)</b> | <b>Time</b> | <b>Step</b>     |
|---------------|------------------------|-------------|-----------------|
| 1             | 98                     | 2 min       | Denaturation    |
| 15            | 98                     | 10 sec      | Denaturation    |
|               | $T_a$                  | 30 sec      | Annealing       |
|               | 72                     | 30 sec      | Extension       |
| 1             | 72                     | 5 min       | Final extension |
| 1             | 10                     | forever     | Hold            |

| <b>Primer</b>          | <b><math>T_a</math></b> |
|------------------------|-------------------------|
| L1HS-nested primer     | 68                      |
| AluYa5/8-nested primer | 68                      |
| AluYb8/9-nested primer | 64                      |



### **Post-PCR Purification**

31. To remove salts, buffer, enzyme, and primers from solution, and perform size selection to retain fragments > approx. 100 bp. Follow steps in 4-14, adding **1.8 x** ratio beads to reaction volume: add 90  $\mu$ L beads per 50  $\mu$ L PCR reaction volume and elute in 20  $\mu$ L EB buffer.

### **Adapter extension**

Generate full-length double-stranded libraries with two adaptors compatible with Illumina bridge sequencing chemistry.

32. Assemble the following PCR reaction mix on ice, followed by gentle vortexing and centrifugation:

| <b>Component</b>                              | <b>Volume (<math>\mu</math>L)</b> |
|-----------------------------------------------|-----------------------------------|
| Clean PCR step 31                             | 18                                |
| dH2O                                          | NA                                |
| PCR mastermix (2x)                            | 25                                |
| Illumina Universal P5 PCR primer (25 $\mu$ M) | 1                                 |
| Index PCR primer 1 P7 (25 $\mu$ M)            | 1                                 |
| total                                         | 5                                 |

33. Perform PCR according to the following thermal cycling conditions:

| <b>Cycles</b> | <b>Temperature (C)</b> | <b>Time</b> | <b>Step</b>     |
|---------------|------------------------|-------------|-----------------|
| 1             | 98                     | 2 min       | Denaturation    |
|               | 98                     | 10 sec      | Denaturation    |
| 5             | 65                     | 30 sec      | Annealing       |
|               | 72                     | 30 sec      | Extension       |
| 1             | 72                     | 5 min       | Final extension |
| 1             | 10                     | forever     | Hold            |

### **Final clean-up**

34. To remove remaining primers, enzyme, incomplete adapter extension fragments, and adaptor-adaptor fragments. Follow steps outlined in 4-14, adding **1x** ratio AMPure XP beads to reaction volume to retain fragments ~150 bp and larger. Elute in 20  $\mu$ L EB buffer.

### **Library pooling for sequencing**

Prepare a pool of libraries originating from each sample, and for each TE element, as follows:

35. Calculate the molarity of each library by obtaining the concentration (eg, Qubit) and size distribution (Agilent TapeStation or Bioanalyzer). A typical library should be free of short (<100 bp) fragments and display a peak at ~300 bp, i.e. half the size of the starting library (Fig. S1)

36. Create a pool of libraries according to the ratios below:

| TE       | Fraction of pool | Expected reads/sample |
|----------|------------------|-----------------------|
| L1HS     | 0.14             | $0.1 \times 10^6$     |
| AluYa5/8 | 0.72             | $0.5 \times 10^6$     |
| AluYb8/9 | 0.16             | $0.11 \times 10^6$    |

NB: The relative quantities of each sample were determined using conservative values of a mean coverage of 50x per TE locus, to achieve a minimum of 5 reads for  $\geq 95\%$  loci.

37. Determine the concentration and size distribution of fragments in the pool as above.
38. Prepare a dilution of the library pool, aiming for a final 10 nM solution in a final concentration of 0.1% tween, ready for Illumina sequencing.

### ***DNA sequencing***

39. Perform paired end sequencing of the pooled libraries on Illumina Miseq, HiSeq 2000, or 2500 instrument according to the manufacturer's specifications (Illumina Inc, San Diego CA).

## SUPPLEMENTARY FIGURE LEGENDS

**Fig. S1. Example TE-enriched library fragment distributions.** Electropherograms of TE-enriched libraries analyzed by Agilent TapeStation D1000 Screen Tape. Profiles of NA12878 libraries produced following the described method are representative for (A) L1HS, (B) AluYa5/8, and (C) AluYb8/9-enriched libraries.

**Fig.S2. Computational pipeline for TE detection from targeted sequencing.** Schematic of the data analysis pipeline. First, reads are filtered and aligned to the human reference genome (hg19). Reads are filtered for features characteristic of the TE-targeted sequencing scheme, namely: (i) presence of primer and (ii) TE-like sequence on Illumina read 2; (iii) mapping quality of unique flanking sequence generated from Illumina read 1. Next, alignments are clustered by genomic position. Last, clusters are annotated against a comprehensive local database compiled from publicly available TE insertion profiles (polyTEdb; see Materials and Methods for details).

**Fig. S3. Concordance among NA12878 TE calls generated by various detection methods.** Venn diagram illustrating the intersection of TE calls (within 100 bp overlap) among (A) LINE1 and (B) Alu observed in NA12878. MEI, Mobile Element Insertion [1]; Phase 3, 1000 Genomes Phase 3 [2]; Ewing, L1 detection [3]

**Fig. S4. Example NA12878-specific 1000 Genomes Phase 3 AluYb9 insertion observed by TE-enriched sequencing.** IGV screenshot of an AluYb9 insertion observed in TE-enriched sequencing libraries generated from NA12878 sample and supported by Oxford Nanopore Technology (ONT) evidence. Two types of ONT evidence were used to manually verify novel TE insertions in NA12878, as illustrated for a known polymorphic insertion observed in 1000 Genomes Phase 3 MEI calls. (A) Hard clipping of reads spanning junction between flanking sequence and 3' end of TE. (B) Multiple insertion "pile-up" at junction corresponding to inserted TE sequence absent from hg19. Top panel, RepeatMasker annotations in hg19 genome reference. 1<sup>st</sup> bam, NA12878 WGS produced by ONT; 2nd bam, NA12878 L1HS-enriched library; 3rd bam, NA12878 AluYa5/8-enriched library; 4th bam, NA12878 AluYb8/9-enriched library.

**Fig. S5. Novel L1HS insertion absent from reference genome and polyTEdb annotations.** (A) IGV screenshot of alignments spanning novel L1HS locus inherited in trio A. Locus junction is spanned by Illumina read 1 reads in proband (WTCHG\_180287\_225.bam), mother (WTCHG\_180287\_226.bam), and father (WTCHG\_180287\_227.bam). IGV colors denote paired reads mapping to discordant chromosomes: chr8 (dark pink/purple), chr10 (pink). (B) Corresponding Illumina read 2 reads from discordant paired ends of fragments spanning a novel L1HS insertion in panel A. Blue bar represents a reference (hg19) annotated full-length L1HS on chr8. The full-length reference L1HS is detected in the assay by concordant read pairs; additional Illumina read 2 reads lacking sufficient sequence to span the unique flanks of novel L1HS will map to highly identical, full-length L1HS in the reference such as this locus.

**Fig. S6. Distribution of mismatches to TE-like sequences in filtered reads derived from clusters.** Example AluYb8/9 (A) Density (proportion of sequences) with a mismatch to the consensus sequence for each position in the TE 3' end. From left to right, position 0 corresponds to the 5' most TE-nested primer, to last nucleotide of TE-like sequence (excluding 3' poly-A tail). (B) Histogram of number of positions with a nucleotide mismatch vs. number of sequences observed with that number of mismatches. Reference True Positives (TP), NA12878 TP, False Positives (FP).

## SUPPLEMENTAL TABLES

**Table S1.** Target and off-target control TE subfamilies in the human reference genome.

|            | TE       | Copies <sup>a</sup> | Length <sup>c</sup><br>(10 <sup>6</sup> bp) |
|------------|----------|---------------------|---------------------------------------------|
| Target     | L1HS     | 1506                | 3.29                                        |
| Target     | AluYa5/8 | 4175                | 1.17                                        |
| Target     | AluYb8/9 | 3138                | 0.88                                        |
| Off-target | L1PA2    | 4805                | 9.41                                        |
| Off-target | AluSx1   | 109589              | 31.87                                       |

<sup>a</sup>Copies, number of loci present in the human reference (hg19) as annotated by RepeatMasker and excluding chrY

<sup>c</sup>Length, total genome length calculated from hg19 annotations (excluding chrY)

**Table S2.** Oligonucleotides for TE-enriched library construction.

| Oligonucleotide              | Reference | Sequence                                                                                 |
|------------------------------|-----------|------------------------------------------------------------------------------------------|
| Index PCR primer 1 (i7/P7)   | [4]       | 5'-CAAGCAGAAGACGGCATACGAGAT-[INDEX <sup>1</sup> ]-GTGACTGGAGTTCAGACGTGTGCTCTTCCGATC*T-3' |
| Universal PCR primer (i5/P5) | [4]       | 5'-AATGATACGGCGACCACCGAGATCTACACTCTTTCCCTACACGACGCTCTTCCGATC*T-3'                        |
| L1HS-target primer           | [5]       | 5'-GGGAGATATACCTAATGCTAGATGACAC-3'                                                       |
| Alu-target primer            | NA        | 5'-AGCTTGCAGTGAGCCGA-3'                                                                  |
| L1HS-nested primer           | NA        | 5'-AGACGTGTGCTCTTCCGATCTTGCACAATGTGCACATGTACCCTAAACTTAG-3'                               |
| AluYa5/8-nested primer       | NA        | 5'-AGACGTGTGCTCTTCCGATCTCGAGATCCGCGCACTG-3'                                              |
| AluYb8/9-nested primer       | NA        | 5'-AGACGTGTGCTCTTCCGATCTGCAGTCCGCAGTCCG-3'                                               |

<sup>1</sup>Index, one of 96 unique 8-mer barcodes  
NA, primers developed in TE-NGS

**Table S3.** TE-enriched sequencing reads derived from NA12878 NGS libraries

| TE Library | Total Reads | Background <sup>a</sup> (%) | Filtered <sup>b</sup> | Clusters <sup>c</sup> | Reference Off-target <sup>d</sup> | Reference target <sup>e</sup> |
|------------|-------------|-----------------------------|-----------------------|-----------------------|-----------------------------------|-------------------------------|
| L1HS       | 334066      | 28618<br>(0.078)            | 127538                | 4512                  | 705<br>(16026)                    | 663<br>(93826)                |
| AluYa5/8   | 553933      | 28489<br>(0.051)            | 486810                | 62863                 | 9586<br>(70896)                   | 2606<br>(53716)               |
| AluYb8/9   | 222967      | 29189<br>(0.13)             | 87525                 | 6293                  | 574<br>(3988)                     | 2029<br>(67940)               |

<sup>a</sup>Background, reads defined as Illumina read 2 lacking discernable primer sequence in first 10 cycles of synthesis

<sup>b</sup>Filtered, reads mapped to hg19 and from filtered read pairs having Illumina read 2 matching exact primer sequence and containing matches to TE-like sequence, and Illumina read 1 with minimum mapping quality (see Materials and Methods for details)

<sup>c</sup>Clusters, genomic windows containing filtered reads grouped by hg19 coordinate position and containing minimum of 1 Illumina read 1

<sup>d</sup>Off-target, loci (reads) observed with minimum 1 Illumina read 1 mapping to hg19 annotated off-target controls (L1PA2 and AluSx1 for L1HS and AluYa58/AluYb89, respectively)

<sup>e</sup>Reference target, hg19 TE loci (reads) observed with minimum 1 Illumina read 1 mapping to predicted TE subfamily

**Table S4.** TE-enriched sequence reads and clusters generated for 12 ClinEx genome samples

| Sample | State <sup>a</sup> | L1HS        |          |                     |                           |                    | AluYa5/8    |          |        |              |       | AluYb8/9    |          |        |              |       |
|--------|--------------------|-------------|----------|---------------------|---------------------------|--------------------|-------------|----------|--------|--------------|-------|-------------|----------|--------|--------------|-------|
|        |                    | Reads Total | Clusters | Ref TP <sup>b</sup> | Known Nonref <sup>c</sup> | Novel <sup>d</sup> | Reads Total | Clusters | Ref TP | Known Nonref | Novel | Reads Total | Clusters | Ref TP | Known Nonref | Novel |
| 1      | P                  | 305548      | 1150     | 628                 | 313                       | 11                 | 1802106     | 46433    | 2554   | 1112         | 29    | 329396      | 2412     | 1715   | 490          | 3     |
| 2      | M                  | 260698      | 1084     | 614                 | 312                       | 14                 | 1789088     | 47251    | 2553   | 1128         | 30    | 319147      | 2523     | 1748   | 526          | 1     |
| 3      | F                  | 248874      | 1114     | 636                 | 309                       | 13                 | 1041334     | 30214    | 2381   | 738          | 9     | 336392      | 2348     | 1671   | 447          | 6     |
| 4      | P                  | 372868      | 1481     | 627                 | 321                       | 89                 | 1989809     | 48644    | 2587   | 1143         | 242   | 380150      | 2589     | 1729   | 517          | 33    |
| 5      | M                  | 322080      | 1282     | 619                 | 305                       | 61                 | 1869648     | 48099    | 2580   | 1140         | 249   | 359665      | 2701     | 1747   | 552          | 29    |
| 6      | F                  | 415449      | 1600     | 632                 | 336                       | 88                 | 1833514     | 46821    | 2552   | 1137         | 225   | 425731      | 2971     | 1770   | 588          | 33    |
| 7      | P                  | 358355      | 1489     | 649                 | 343                       | 77                 | 1729632     | 45181    | 2584   | 1154         | 88    | 803936      | 3481     | 1781   | 623          | 45    |
| 8      | P                  | 197413      | 269      | 10                  | 6                         | 108                | 1074511     | 9        | 1      | 0            | 1     | 413993      | 0        | 0      | 0            | 0     |
| 9      | P                  | 275143      | 1340     | 634                 | 321                       | 45                 | 772839      | 28328    | 2527   | 871          | 31    | 175274      | 2333     | 1705   | 474          | 5     |
| 10     | P                  | 226176      | 1132     | 630                 | 337                       | 17                 | 727861      | 24407    | 2335   | 670          | 8     | 184436      | 2094     | 1624   | 397          | 1     |
| 11     | P                  | 391069      | 1514     | 648                 | 380                       | 45                 | 725361      | 25132    | 2396   | 699          | 28    | 193735      | 2200     | 1644   | 423          | 6     |
| 12     | P                  | 265181      | 1219     | 642                 | 324                       | 23                 | 767638      | 24647    | 2402   | 684          | 10    | 244582      | 2227     | 1657   | 408          | 2     |

<sup>a</sup>State, affected status of sample: P, proband; M, mother; F, father

<sup>b</sup>Ref TP, observed reference true positive insertions with a TE cluster within 600 bp window of 3' terminal position and match to predicted TE subfamily

<sup>c</sup>Known Nonref, known non-reference insertions with a TE cluster mapping within 600 bp window of 3' terminal position (if strand orientation provided)

<sup>d</sup>Novel, loci lacking evidence of TE insertion within 600 bp window of cluster position.





**Fig. S1**

**A.**

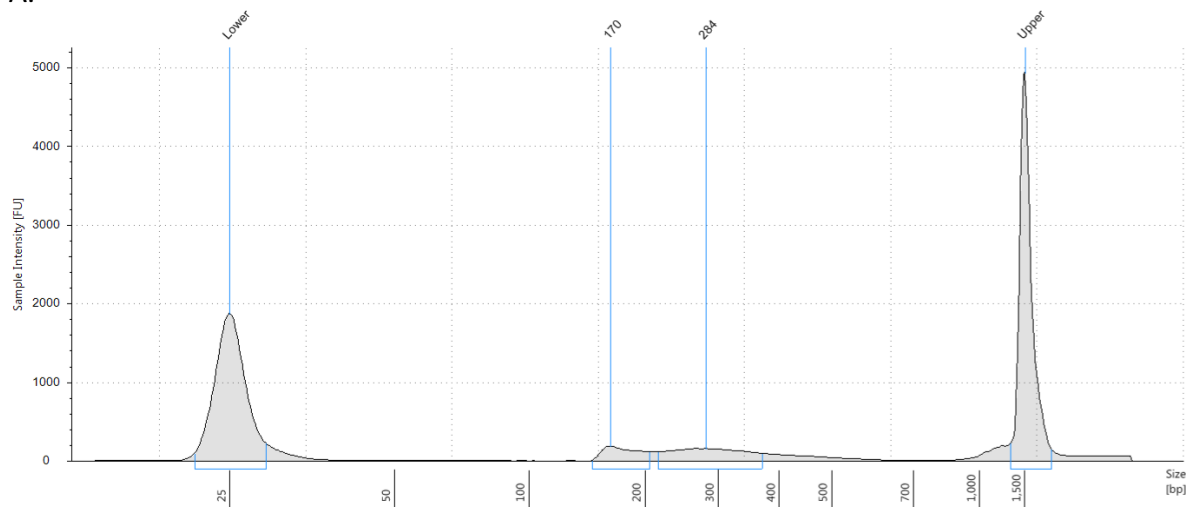

**B.**

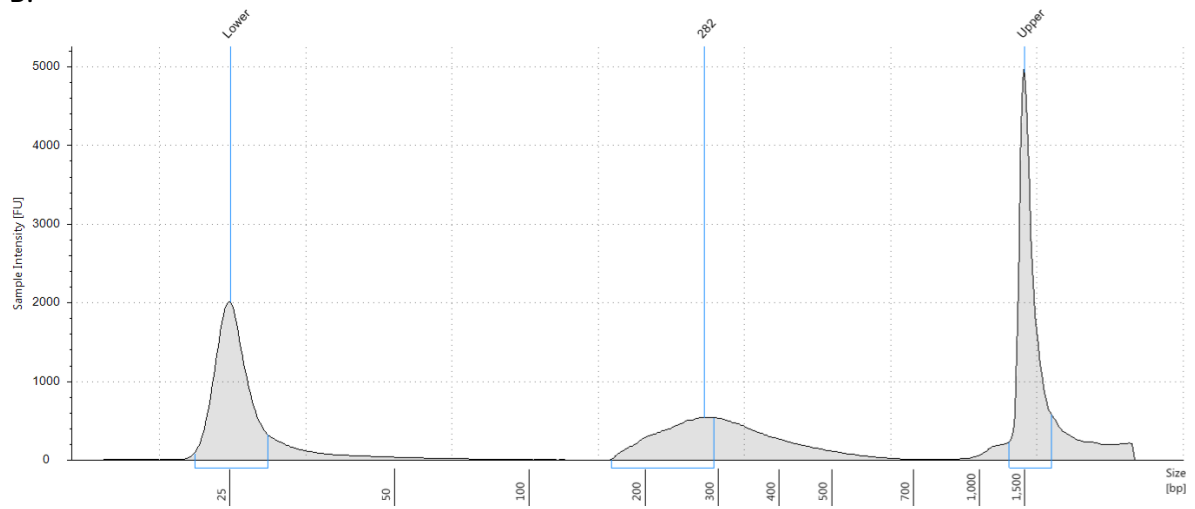

**C.**

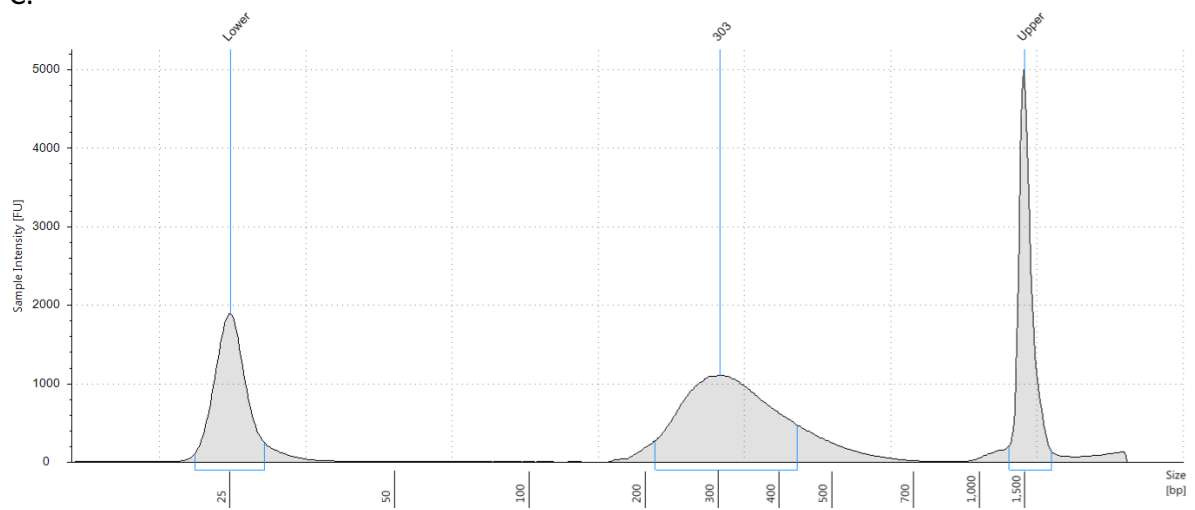

Fig. S2

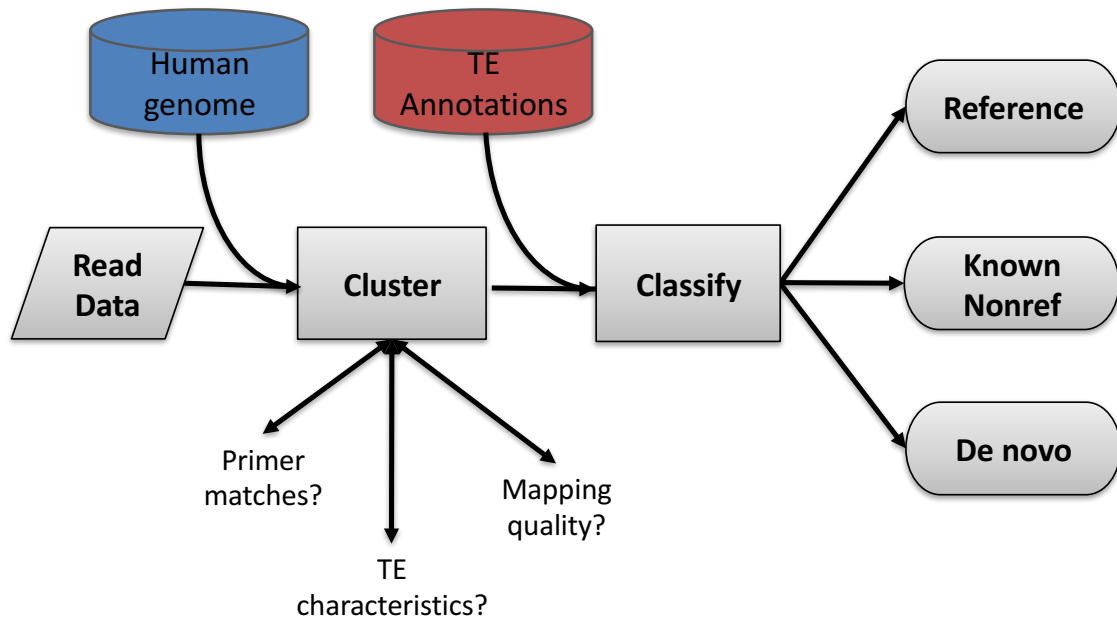

Fig. S3

A.

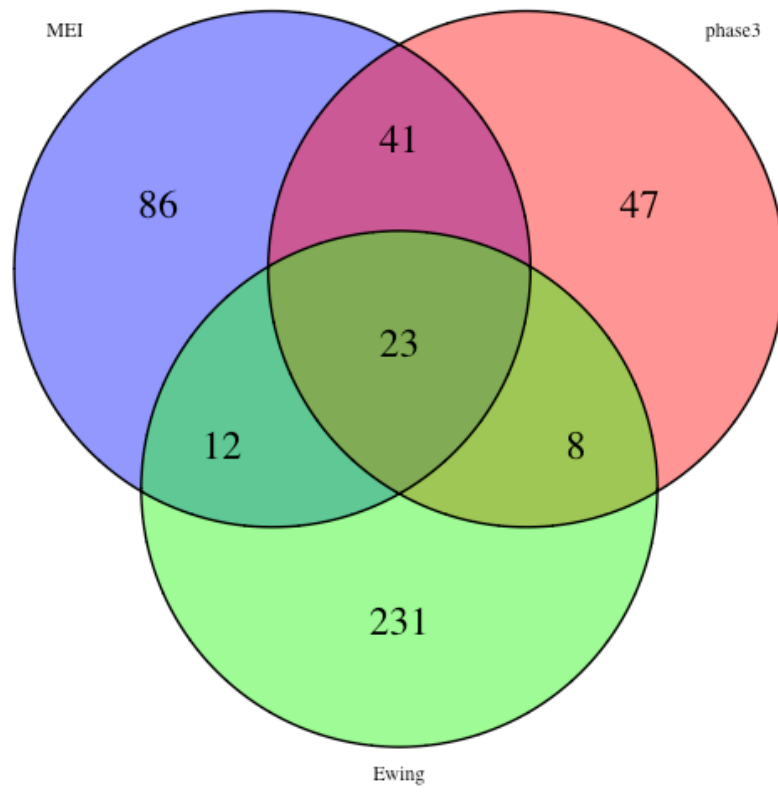

B.

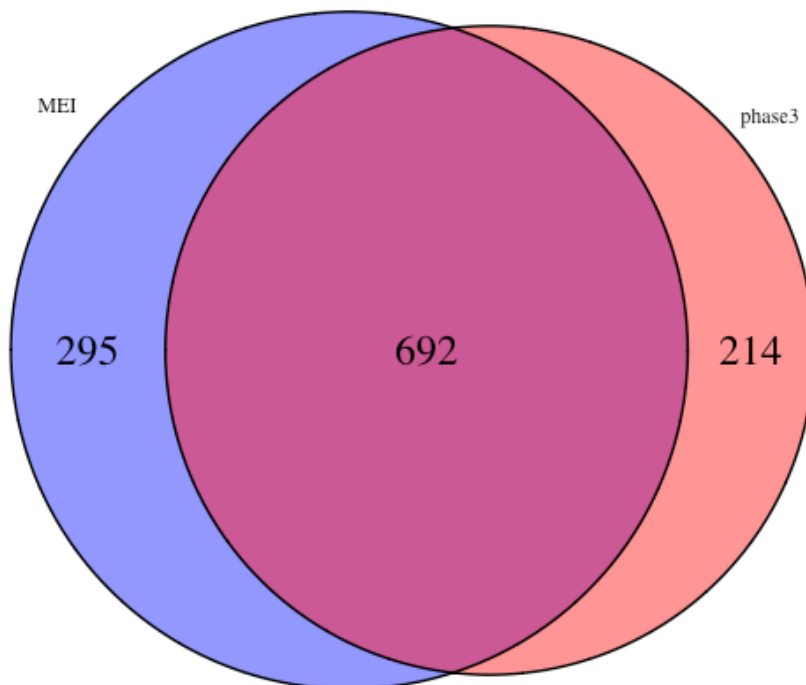

Fig. S4

A.

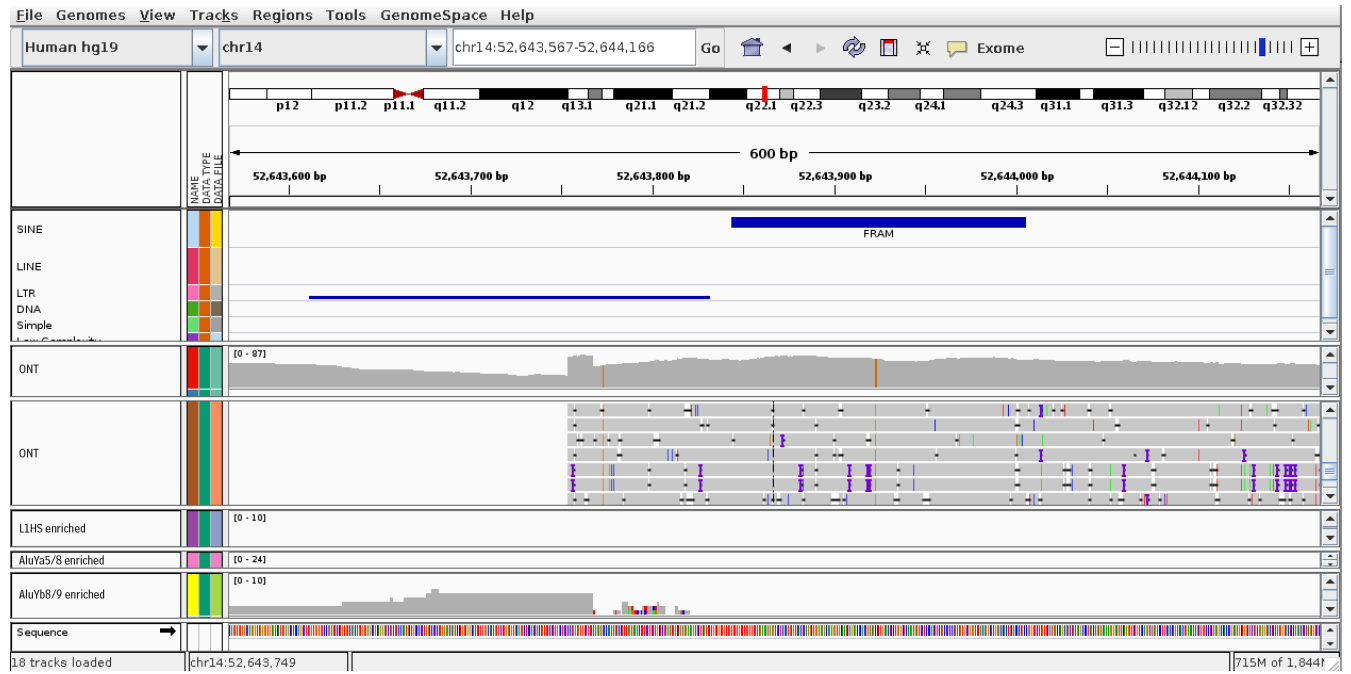

B.

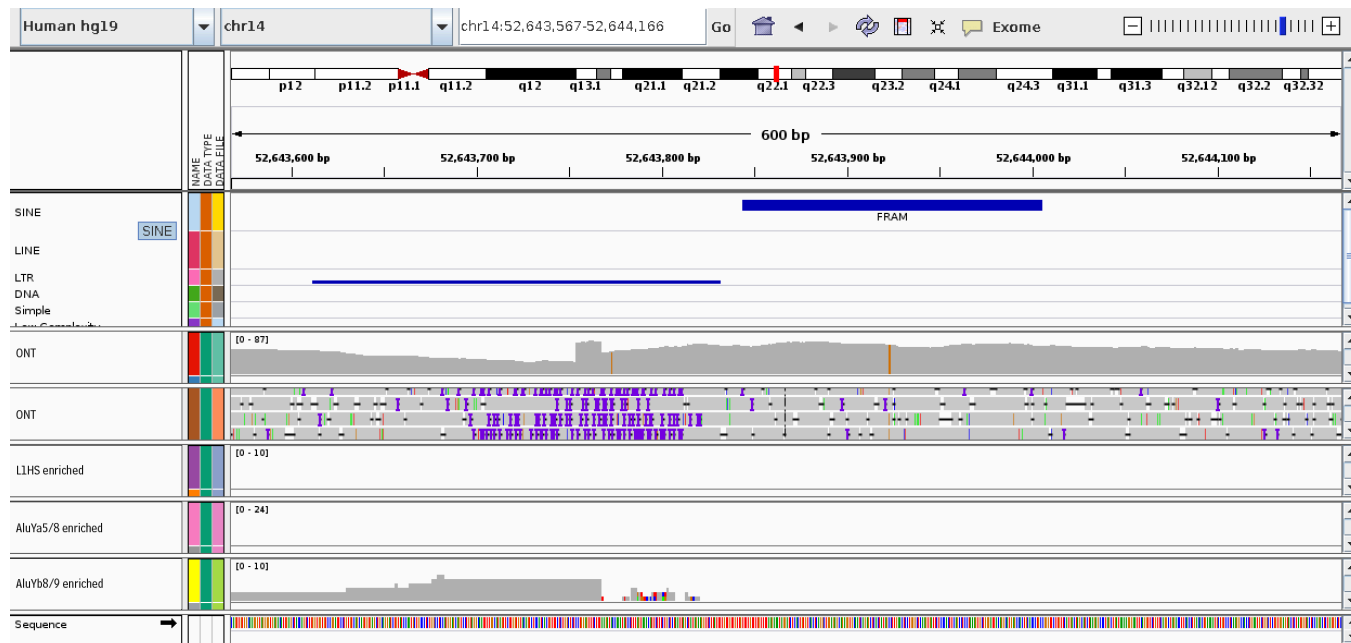

Fig. S5

A.

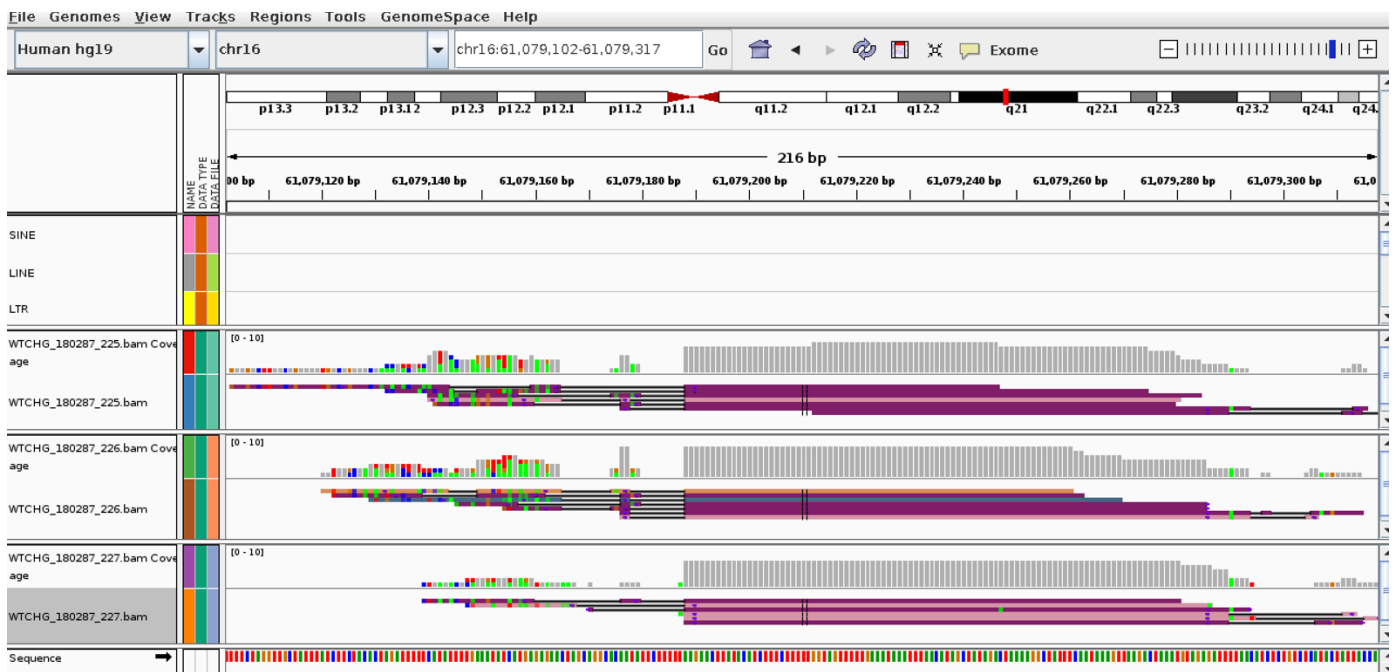

B.

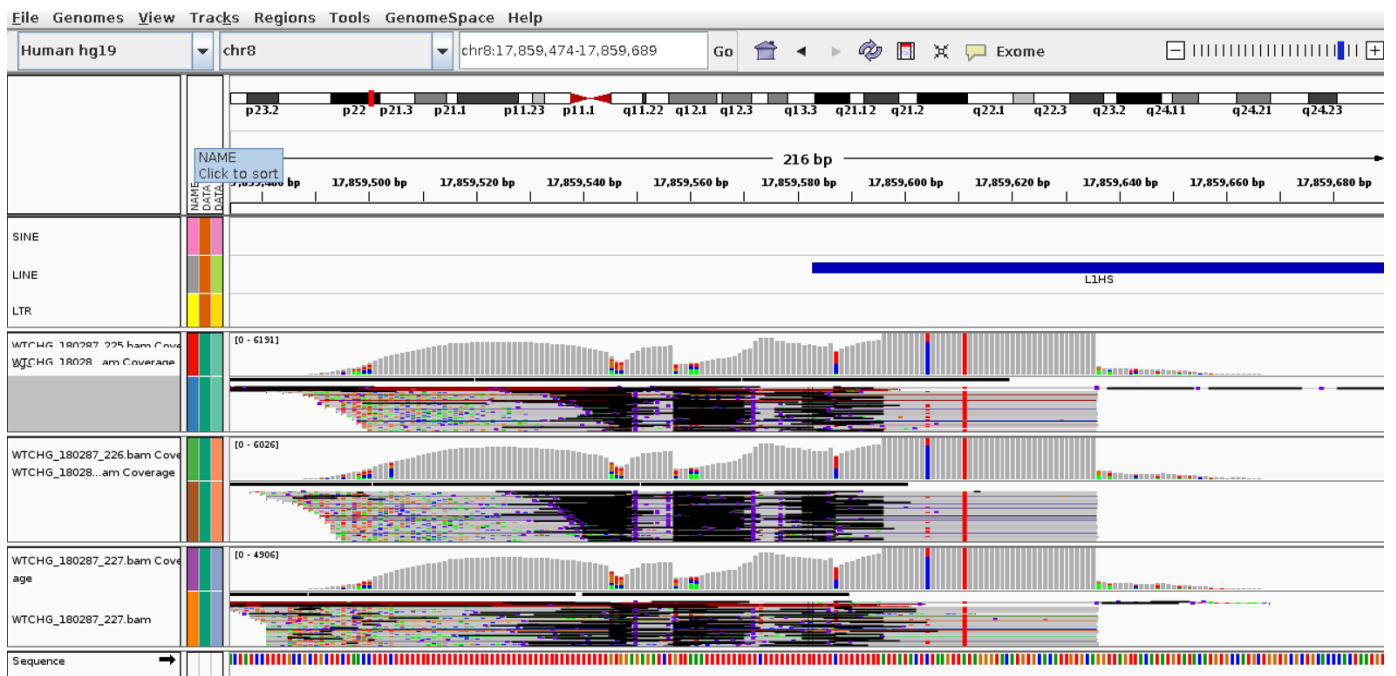

Fig. S6

A.

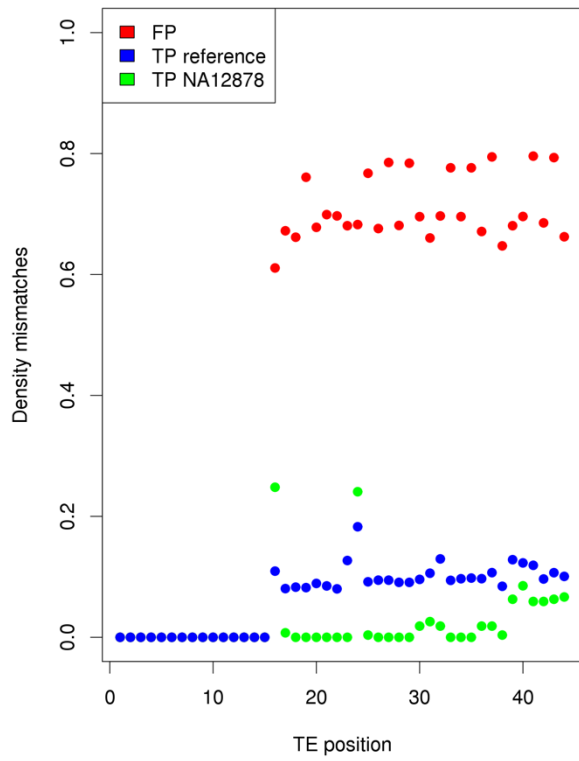

B.

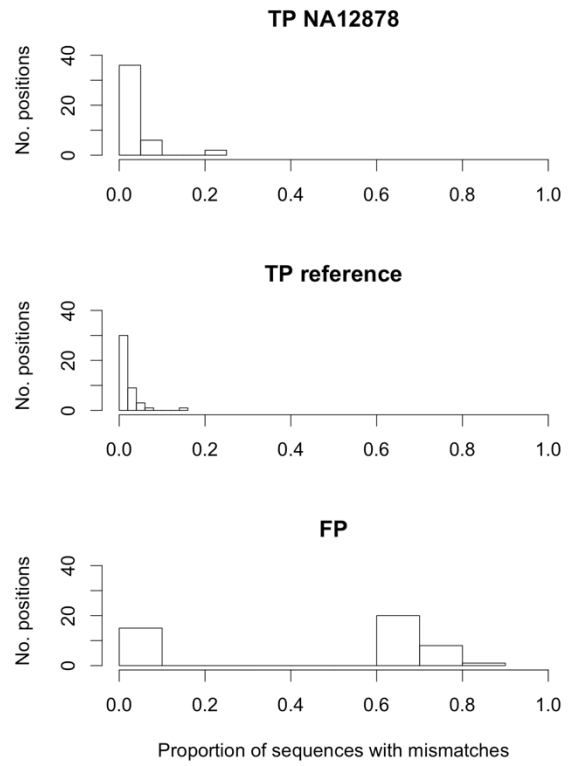

## SUPPLEMENTARY REFERENCES

1. Stewart C, Kural D, Stromberg MP, Walker JA, Konkel MK, Stutz AM, Urban AE, Grubert F, Lam HY, Lee WP *et al*: **A comprehensive map of mobile element insertion polymorphisms in humans.** *PLoS Genet* 2011, **7**(8):e1002236.
2. Sudmant PH, Rausch T, Gardner EJ, Handsaker RE, Abyzov A, Huddleston J, Zhang Y, Ye K, Jun G, Hsi-Yang Fritz M *et al*: **An integrated map of structural variation in 2,504 human genomes.** *Nature* 2015, **526**(7571):75-81.
3. Ewing AD, Kazazian HH, Jr.: **Whole-genome resequencing allows detection of many rare LINE-1 insertion alleles in humans.** *Genome Res* 2011, **21**(6):985-990.
4. Illumina: **Oligonucleotide sequences** © Illumina, Inc. All rights reserved. In.; 2016.
5. Ewing AD, Kazazian HH, Jr.: **High-throughput sequencing reveals extensive variation in human-specific L1 content in individual human genomes.** *Genome Res* 2010, **20**(9):1262-1270.
